# Supplementary material for: The potential of epigenetic therapy to target the 3D epigenome in endocrine-resistant breast cancer
Source: PubMed Central journal article supplement (PMC10948365; doi:10.1038/s41594-023-01181-7), 2024-01-05

Uncropped versions of Western blot, labelled with the relevant panel and identifying information such as the antibody used.

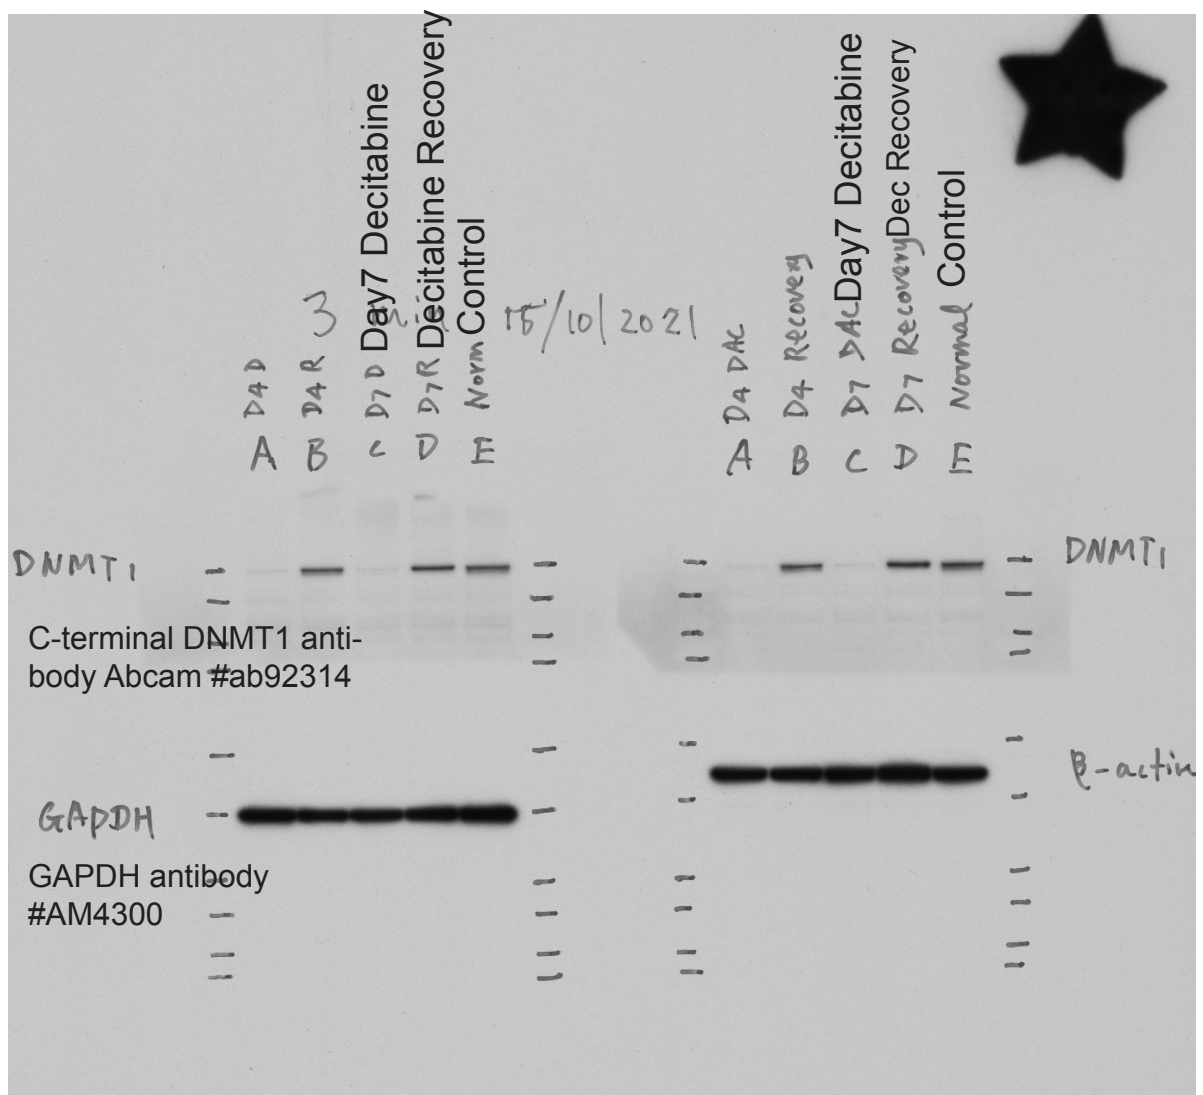

Supplement: 41594_2023_1181_MOESM6_ESM.pdf [file 41594_2023_1181_MOESM6_ESM.pdf]
